# Supplementary material
Source: HighWire-hosted journal article supplement (https://www.cmajopen.ca/highwire/filestream/89245/field_highwire_adjunct_files/0/open-2021-0236-1-at.pdf)
Supplement: open-2021-0236-1-at.pdf [file open-2021-0236-1-at.pdf]

# Supplementary Appendix to ‘Estimating the test-adjusted incidence of *Chlamydia trachomatis* infections identified through Public Health Ontario laboratories in Peel region, Ontario, 2010–2018: A population-based study’

## Appendix 1: Methods and Equations

### *Standardized morbidity ratio, testing ratio, and test positivity*

Standardized morbidity ratio, testing ratio, and test positivity (SMR, STR, and STP) were estimated for monthly and cumulative data to explore infections, testing, and test positivity. Where a ratio above 1 indicate infections, testing, or test positivity are higher than expected, and below 1 indicates they are lower than expected. First, average annual incidence of infection, testing, and positivity per test, was calculated for the population as a whole and for each age-sex subgroup. The ratios were then estimated by dividing subgroup specific estimates by the overall population estimates. Confidence intervals were calculated using standard error estimates as follows (14):

$$\text{EQ1. SE} (\ln(\text{SMR, STR or STP})) = \sqrt{\left(\frac{1}{A}\right) - \left(\frac{1}{A+C}\right) + \left(\frac{1}{B}\right) - \left(\frac{1}{B+D}\right)}$$

Where  $A$  is the case or test count in a subgroup,  $B$  is the case or test count not in the subgroup,  $C$  is the subgroup population or test count subtract  $A$ , and  $D$  is the population or test count not in the subgroup subtract  $B$ . The effect of sex and age on standardized morbidity ratios, standardized testing ratios, and standardized test positivity was explored using meta-regression models using monthly standardized ratio estimates. The model follows the form of:

$$\text{EQ2. } \ln(\text{SMR}_{ij}, \text{STR}_{ij}, \text{ or } \text{STP}_{ij}) = \alpha + \beta_i x_i + \beta_j x_j$$

where  $\alpha$  is the model intercept and each  $\beta$  represents a coefficient for the  $i^{\text{th}}$  age group and  $j^{\text{th}}$  sex.

### *Adjusting for testing*

To account for the differential testing across age and sex subgroups, a test-adjusted incidence using standardization was applied. First, the “test-adjusted” SMR was estimated for each age-sex subgroup using meta-regression models where the  $\ln(\text{STR})$  is the independent variable. Standard errors were calculated as described above and within-subgroup standard errors were estimated by the square root of summed variance of SMR and STR. The model follows the form of:

$$\text{EQ3. } \ln(\text{SMR}_{ij}) = \alpha_{ij} + \beta_{ij} \ln(\text{STR}_{ij})$$

where  $\alpha$  is the model intercept and each  $\beta$  represents a coefficient for the subgroup of  $i^{\text{th}}$  age group and  $j^{\text{th}}$  sex (2). When STR is equal to 1, where testing in a given subgroup is equivalent to the overall population test rate,  $\ln(\text{STR})$  is zero and therefore, the SMR is equal to the intercept,  $\alpha$ , exponentiated ( $e^\alpha$ ). This can be interpreted as the test-frequency-adjusted SMR expected when all age-sex subgroups were tested at the same rate as the population overall. To investigate this further, the expected test-frequency-adjusted incidence of each subgroup (if tested at the same rate as the maximally tested subgroup) was calculated, as follows:

$$\text{EQ4. } I_{ijT_{\max}} = \text{SMR}_{ij} * I_0$$

Hence, the observed average annual incidence in the maximally tested  $i^{\text{th}}$  age group and  $j^{\text{th}}$  sex,  $I_{ijT_{\max}}$ , was divided by the test-adjusted  $\text{SMR}_{ij}$  to find  $I_0$ , the test-adjusted expected incidence in the population overall. For all other subgroups, the test-adjusted incidence when tested at the rate of the maximally tested subgroup, was the test-adjusted  $\text{SMR}_{ij}$  multiplied by  $I_0$ . This calculation was conducted for each age-sex subgroup, where females aged 20–29 were the maximally tested subgroup.

## Appendix 2: Tables

**Table A1:** Data sources and variables used in study.

| Variable                             | Data source                                         |
|--------------------------------------|-----------------------------------------------------|
| Population                           | Statistics Canada Census (3–5)                      |
| Cases by age and sex subgroups       | Integrated Public Health Information System (iPHIS) |
| Test counts by age and sex subgroups | Ontario Laboratory Information System (OLIS)        |

**Table A2:** Summary of monthly chlamydia incidence and testing rates and percentage positivity by age group and sex in Peel, Ontario, identified through Public Health Ontario laboratories, 2010–2018.

| Demographic   |                    | Monthly Median Value (Range) |               |                 |
|---------------|--------------------|------------------------------|---------------|-----------------|
| Sex           | Age Group          | Cases                        | Tests         | Positivity (%)  |
| <b>Female</b> | <b>15-19</b>       | 14 (4–26)                    | 134 (96–194)  | 11.1 (3.8–18.5) |
|               | <b>20-29</b>       | 29 (15–47)                   | 552 (407–668) | 5.3 (2.5–8.9)   |
|               | <b>30-39</b>       | 5 (1–14)                     | 269 (166–365) | 1.7 (0.3–6.3)   |
|               | <b>40 and over</b> | 2 (0–6)                      | 174 (90–268)  | 1.0 (0–3.3)     |
| <b>Male</b>   | <b>15-19</b>       | 5 (0–14)                     | 43 (23–71)    | 12.5 (0–27.0)   |
|               | <b>20-29</b>       | 27 (14–42)                   | 270 (182–443) | 9.1 (4.4–16.2)  |
|               | <b>30-39</b>       | 7 (1–17)                     | 132 (82–219)  | 5.6 (0.8–12.6)  |
|               | <b>40 and over</b> | 4 (0–9)                      | 105 (67–182)  | 3.4 (0–11.8)    |

**Table A3:** Standardized morbidity ratio (SMR), testing ratio (STR), and test positivity (STP) of chlamydia infections, by age and sex groups, in Peel, Ontario, identified through Public Health Ontario laboratories, 2010–2018.

| Demographic |             | Standardized Ratios |                  |                  |
|-------------|-------------|---------------------|------------------|------------------|
| Sex         | Age Group   | SMR (95% CI)        | STR (95% CI)     | STP (95% CI)     |
| Female      | 15-19       | 3.62 (3.43–3.82)    | 1.87 (1.84–1.90) | 1.93 (1.83–2.04) |
|             | 20-29       | 3.71 (3.56–3.87)    | 3.85 (3.81–3.89) | 0.97 (0.92–1.01) |
|             | 30-39       | 0.61 (0.56–0.67)    | 1.79 (1.77–1.82) | 0.34 (0.32–0.37) |
|             | 40 and over | 0.06 (0.05–0.07)    | 0.34 (0.33–0.34) | 0.17 (0.15–0.20) |
| Male        | 15-19       | 1.22 (1.12–1.32)    | 0.54 (0.53–0.56) | 2.24 (2.05–2.45) |
|             | 20-29       | 3.31 (3.17–3.45)    | 1.97 (1.95–2.00) | 1.68 (1.60–1.75) |
|             | 30-39       | 1.07 (1.01–1.15)    | 1.03 (1.01–1.05) | 1.04 (0.97–1.12) |
|             | 40 and over | 0.15 (0.14–0.17)    | 0.24 (0.23–0.24) | 0.65 (0.59–0.71) |

**Table A4:** Meta-regression models of sex and age on standardized morbidity ratios, standardized testing ratios, and standardized test positivity, in Peel, Ontario, identified through Public Health Ontario laboratories, 2010–2018. Females aged 20-29 were used as the referent group in meta-regression models.

| <b>Covariate</b>   | <b>SMR (95% CI)</b> | <b>STR (95% CI)</b> | <b>STP (95% CI)</b> |
|--------------------|---------------------|---------------------|---------------------|
| <b>Sex</b>         |                     |                     |                     |
| <b>Male</b>        | 0.872 (0.826–0.920) | 0.504 (0.490–0.518) | 1.837 (1.753–1.901) |
| <b>Female</b>      | 1 (referent)        | 1 (referent)        | 1 (referent)        |
| <b>Age</b>         |                     |                     |                     |
| <b>15-19</b>       | 0.754 (0.706–0.805) | 0.387 (0.372–0.403) | 1.842 (1.759–1.953) |
| <b>20-29</b>       | 1 (referent)        | 1 (referent)        | 1 (referent)        |
| <b>30-39</b>       | 0.264 (0.245–0.283) | 0.490 (0.472–0.509) | 0.521 (0.498–0.562) |
| <b>40 and over</b> | 0.041 (0.037–0.045) | 0.101 (0.098–0.105) | 0.366 (0.343–0.406) |

**Table A5:** Observed and test-adjusted incidence of chlamydia infections, by age and sex subgroups, in Peel, Ontario, identified through Public Health Ontario laboratories, 2010–2018.

| <b>Age Group</b>   | <b>Female</b> |                    | <b>Male</b> |                    | <b>Overall</b> |                   |
|--------------------|---------------|--------------------|-------------|--------------------|----------------|-------------------|
|                    | Obs.          | Test-adj. (95% CI) | Obs.        | Test-adj. (95% CI) | Obs.           | Test-adj (95% CI) |
| <b>15–19</b>       | 379           | 299 (231–388)      | 128         | 205 (152–277)      | 248            | 249 (236–263)     |
| <b>20–29</b>       | 388           | 388 (132–1143)     | 346         | 340 (257–449)      | 367            | 338 (306–372)     |
| <b>30–39</b>       | 65            | 69 (45–108)        | 113         | 124 (115–134)      | 87             | 118 (109–127)     |
| <b>40 and over</b> | 7             | 23 (6–81)          | 16          | 40 (16–99)         | 11             | 5 (3–9)           |

## Appendix References

1. Sharp S. Meta-analysis regression [Internet]. Stata Technical Bulletin. 1998. p. 16–22. Available from: <https://www.stata-press.com/journals/stbcontents/stb42.pdf>
2. Fisman DN, Greer AL, Hillmer M, O'Brien SF, Drews SJ, Tuite AR. COVID-19 Case Age Distribution: Correction for Differential Testing by Age. 2021;
3. Statistics Canada. 2006 Census of Population [Internet]. Ottawa, ON: Statistics Canada; 2007. Available from: <https://www12.statcan.gc.ca/census-recensement/2006/dp-pd/prof/92-591/index.cfm?Lang=E%0A>
4. Statistics Canada. 2011 Census of Population [Internet]. Ottawa, ON: Statistics Canada; 2012. Available from: <http://www12.statcan.gc.ca/census-recensement/2011/dp-pd/prof/index.cfm?Lang=E>
5. Statistics Canada. 2016 Census of Population [Internet]. Ottawa, ON: Statistics Canada; 2017. Available from: <http://www12.statcan.gc.ca/census-recensement/2016/dp-pd/prof/index.cfm?Lang=E>
